# Supplementary material for: Detection of Flood Damage in Urban Residential Areas Using Object-Oriented UAV Image Analysis Coupled with Tree-Based Classifiers
Source: MDPI journal article supplement (doi:10.3390/rs13193913), 2021-09-30
Supplement: s1 [file s1]

# **Detection of Flood Damage in Urban Residential Areas Using Object-Oriented UAV Image Analysis Coupled with Tree-Based Classifiers**

## **Supplementary Materials**

**Table S1** Aggregation of land cover classes present in the OS MasterMap topographic layer used as an ancillary dataset in the automated procedure for detection of flood damage. Field “CLASS” corresponds to the main land cover classes used in the study; the remaining columns contain land cover features descriptors provided by the Ordnance Survey.

| CLASS     | Theme                              | Descriptive         | Descript_1                 | Make         | Key                                                |
|-----------|------------------------------------|---------------------|----------------------------|--------------|----------------------------------------------------|
| Buildings | Buildings                          | Building            |                            | Manmade      | Buildings_Building                                 |
|           | Buildings                          | Building            | Archway                    | Manmade      | Buildings_Building                                 |
|           | Buildings                          | Glasshouse          |                            | Manmade      | Buildings_Glasshouse                               |
| Land      | Land                               | General Surface     |                            | Manmade      | Land_General Surface                               |
|           | Land                               | General Surface     |                            | Natural      | Land_General Surface                               |
|           | Land                               | General Surface     | Multi Surface              | Multiple     | Land_General Surface                               |
|           | Land                               | General Surface     | Step                       | Manmade      | Land_General Surface                               |
|           | Land                               | Landform            | Slope                      | Manmade      | Land_Landform                                      |
|           | Land                               | Natural Environment | Coniferous Trees           | Natural      | Land_Natural Environment                           |
|           |                                    |                     | Coniferous Trees,          |              |                                                    |
|           | Land                               | Natural Environment | Nonconiferous Trees        | Natural      | Land_Natural Environment                           |
|           |                                    |                     | Coniferous Trees,          |              |                                                    |
|           | Land                               | Natural Environment | Nonconiferous Trees, Scrub | Natural      | Land_Natural Environment                           |
|           | Land                               | Natural Environment | Nonconiferous Trees        | Natural      | Land_Natural Environment                           |
|           | Land                               | Natural Environment | Nonconiferous Trees, Scrub | Natural      | Land_Natural Environment                           |
|           | Land                               | Natural Environment | Scrub                      | Natural      | Land_Natural Environment                           |
|           | Land                               | Natural Environment | Scrub, Coniferous Trees    | Natural      | Land_Natural Environment                           |
|           | Land                               | Natural Environment | Scrub, Nonconiferous Trees | Natural      | Land_Natural Environment                           |
|           | Land                               | Unclassified        |                            | Unclassified | Land_Unclassified                                  |
|           |                                    | General Surface,    |                            |              | Land, Structures_General                           |
|           | Land, Structures                   | Structure           |                            | Manmade      | Surface, Structure                                 |
|           | Roads Tracks and Paths             | Path                |                            | Manmade      | Roads Tracks and Paths_Path                        |
|           | Roads Tracks and Paths             | Path                | Step                       | Manmade      | Roads Tracks and Paths_Path                        |
|           | Roads Tracks and Paths, Structures | Path, Structure     |                            | Manmade      | Roads Tracks and Paths, Structures_Path, Structure |
|           | Roads Tracks and Paths, Structures | Structure, Path     |                            | Manmade      | Roads Tracks and Paths, Structures_Structure, Path |

| CLASS | Theme                              | Descriptive              | Descript_1      | Make    | Key                                                         |
|-------|------------------------------------|--------------------------|-----------------|---------|-------------------------------------------------------------|
| Land  | Structures                         | Structure                |                 | Manmade | Structures_Structure                                        |
| Road  | Roads Tracks and Paths             | Road or Track            |                 | Manmade | Roads Tracks and Paths_Road or Track                        |
|       | Roads Tracks and Paths             | Road or Track            | Track           | Natural | Roads Tracks and Paths_Road or Track                        |
|       | Roads Tracks and Paths             | Road or Track            | Traffic Calming | Manmade | Roads Tracks and Paths_Road or Track                        |
|       | Roads Tracks and Paths             | Roadside                 |                 | Manmade | Roads Tracks and Paths_Roadside                             |
|       | Roads Tracks and Paths             | Roadside                 |                 | Natural | Roads Tracks and Paths_Roadside                             |
|       | Roads Tracks and Paths, Structures | Road or Track, Structure |                 | Manmade | Roads Tracks and Paths, Structures_Road or Track, Structure |
|       | Roads Tracks and Paths, Structures | Roadside, Structure      |                 | Manmade | Roads Tracks and Paths, Structures_Roadside, Structure      |
|       | Roads Tracks and Paths, Structures | Roadside, Structure      |                 | Natural | Roads Tracks and Paths, Structures_Roadside, Structure      |
| Water | Water                              | Inland Water             |                 | Natural | Water_Inland Water                                          |

**Table S2** ANOVA analysis for selected descriptors of objects belonging to ancillary land cover classes used for refinement of buildings delineated by the topographic map. Significance levels are marked as follows for respective *p*-values: *p*-value < 0.001 \*\*\*, *p*-value < 0.01 \*\*, *p*-value < 0.05 \*, not significant 'ns'. GLCM—grey-level co-occurrence matrix, RGB—red, green, blue bands of the UAV image.

| <b>Asymmetry</b>       | <b>Roof</b> | <b>Dark land</b> | <b>Tiling</b> | <b>White wall</b> | <b>Heaps of debris</b> |
|------------------------|-------------|------------------|---------------|-------------------|------------------------|
| <b>Dark land</b>       | ***         |                  |               |                   |                        |
| <b>Tiling</b>          | ***         | ns               |               |                   |                        |
| <b>White wall</b>      | ***         | ***              | ***           |                   |                        |
| <b>Heaps of debris</b> | ***         | ns               | ns            | ***               |                        |
| <b>Conservatory</b>    | ***         | ***              | ***           | ***               | ***                    |

| <b>Brightness</b>      | <b>Roof</b> | <b>Dark land</b> | <b>Tiling</b> | <b>White wall</b> | <b>Heaps of debris</b> |
|------------------------|-------------|------------------|---------------|-------------------|------------------------|
| <b>Dark land</b>       | ***         |                  |               |                   |                        |
| <b>Tiling</b>          | **          | ***              |               |                   |                        |
| <b>White wall</b>      | ***         | ***              | ***           |                   |                        |
| <b>Heaps of debris</b> | ***         | ***              | ***           | ***               |                        |
| <b>Conservatory</b>    | ***         | ***              | ***           | ns                | ***                    |

| <b>Distance to buildings</b> | <b>Roof</b> | <b>Dark land</b> | <b>Tiling</b> | <b>White wall</b> | <b>Heaps of debris</b> |
|------------------------------|-------------|------------------|---------------|-------------------|------------------------|
| <b>Dark land</b>             | ***         |                  |               |                   |                        |
| <b>Tiling</b>                | ***         | ***              |               |                   |                        |
| <b>White wall</b>            | ns          | **               | ***           |                   |                        |
| <b>Heaps of debris</b>       | ***         | ***              | **            | ***               |                        |
| <b>Conservatory</b>          | ***         | *                | ***           | ***               | ***                    |

| <b>GLCM contrast</b>   | <b>Roof</b> | <b>Dark land</b> | <b>Tiling</b> | <b>White wall</b> | <b>Heaps of debris</b> |
|------------------------|-------------|------------------|---------------|-------------------|------------------------|
| <b>Dark land</b>       | ***         |                  |               |                   |                        |
| <b>Tiling</b>          | *           | ***              |               |                   |                        |
| <b>White wall</b>      | ***         | ***              | ***           |                   |                        |
| <b>Heaps of debris</b> | ***         | ***              | ***           | ***               |                        |
| <b>Conservatory</b>    | ***         | ***              | ***           | ***               | ***                    |

| <b>Length/Width Ratio</b> | <b>Roof</b> | <b>Dark land</b> | <b>Tiling</b> | <b>White wall</b> | <b>Heaps of debris</b> |
|---------------------------|-------------|------------------|---------------|-------------------|------------------------|
| <b>Dark land</b>          | ***         |                  |               |                   |                        |
| <b>Tiling</b>             | ***         | ns               |               |                   |                        |
| <b>White wall</b>         | ***         | ***              | ***           |                   |                        |
| <b>Heaps of debris</b>    | ***         | ns               | ns            | ***               |                        |
| <b>Conservatory</b>       | ***         | ***              | ***           | ***               | ***                    |

| <b>Mode of maximum values in B</b> | <b>Roof</b> | <b>Dark land</b> | <b>Tiling</b> | <b>White wall</b> | <b>Heaps of debris</b> |
|------------------------------------|-------------|------------------|---------------|-------------------|------------------------|
| <b>Dark land</b>                   | ***         |                  |               |                   |                        |
| <b>Tiling</b>                      | ***         | ***              |               |                   |                        |
| <b>White wall</b>                  | ***         | ***              | ***           |                   |                        |
| <b>Heaps of debris</b>             | ***         | ***              | ***           | ***               |                        |
| <b>Conservatory</b>                | ***         | ***              | ***           | ns                | ***                    |

| Mode of maximum values in G | Roof | Dark land | Tiling | White wall | Heaps of debris |
|-----------------------------|------|-----------|--------|------------|-----------------|
| Dark land                   | ***  |           |        |            |                 |
| Tiling                      | ***  | ***       |        |            |                 |
| White wall                  | ***  | ***       | ***    |            |                 |
| Heaps of debris             | ***  | ***       | ***    | ***        |                 |
| Conservatory                | ***  | ***       | ***    | ns         | ***             |

| Mode of maximum values in R | Roof | Dark land | Tiling | White wall | Heaps of debris |
|-----------------------------|------|-----------|--------|------------|-----------------|
| Dark land                   | ***  |           |        |            |                 |
| Tiling                      | ***  | ***       |        |            |                 |
| White wall                  | ***  | ***       | ***    |            |                 |
| Heaps of debris             | ***  | ***       | ***    | ***        |                 |
| Conservatory                | ***  | ***       | ***    | ns         | ***             |

| Relative border to buildings | Roof | Dark land | Tiling | White wall | Heaps of debris |
|------------------------------|------|-----------|--------|------------|-----------------|
| Dark land                    | ***  |           |        |            |                 |
| Tiling                       | ***  | *         |        |            |                 |
| White wall                   | ***  | ***       | **     |            |                 |
| Heaps of debris              | ***  | **        | ***    | ***        |                 |
| Conservatory                 | ***  | ns        | ***    | ***        | *               |

| Relative border to land | Roof | Dark land | Tiling | White wall | Heaps of debris |
|-------------------------|------|-----------|--------|------------|-----------------|
| Dark land               | ***  |           |        |            |                 |
| Tiling                  | *    | ***       |        |            |                 |
| White wall              | ***  | ***       | ***    |            |                 |
| Heaps of debris         | ***  | ***       | ***    | ***        |                 |
| Conservatory            | ***  | ***       | ***    | ***        | ***             |

| Width           | Roof | Dark land | Tiling | White wall | Heaps of debris |
|-----------------|------|-----------|--------|------------|-----------------|
| Dark land       | ***  |           |        |            |                 |
| Tiling          | *    | ***       |        |            |                 |
| White wall      | ***  | ***       | ***    |            |                 |
| Heaps of debris | ***  | ***       | ***    | ***        |                 |
| Conservatory    | **   | ***       | ***    | ***        | ns              |

**Table S3** Building refinement procedure.

| Step | Source class | Target class | Condition                                                                                                                                                                                                   | No of cycles |
|------|--------------|--------------|-------------------------------------------------------------------------------------------------------------------------------------------------------------------------------------------------------------|--------------|
| 1    | Land         | Buildings    | Brightness > 80<br>AND border to buildings > 9<br>AND mode[max]R > 80 AND mode[max]R < 180<br>AND mode[max]G > 80 AND mode[max]G < 210<br>AND mode[max]B > 125 AND mode[max]B < 210                         | 1            |
| 2    | Land         | Buildings    | Brightness > 175<br>AND Relative border to buildings > 0.1<br>AND Width < 10<br>AND mode[max]R > 180<br>AND mode[max]G > 180<br>AND mode[max]B > 180                                                        | 1            |
| 3    | Land         | Buildings    | Relative border to buildings > 0.6                                                                                                                                                                          | 3            |
| 4    | Land         | Buildings    | Brightness > 90<br>AND Brightness < 130<br>AND Border to buildings > 20<br>AND mode[max]R > 80 AND mode[max]R < 130<br>AND mode[max]G > 80 AND mode[max]G < 130<br>AND mode[max]B > 90 AND mode[max]B < 130 | 1            |
| 5    | Land         | Buildings    | Relative border to buildings > 0.6                                                                                                                                                                          | 3            |
| 6    | Land         | White wall   | Brightness > 160<br>AND Width < 10<br>AND Relative border to buildings > 0.1<br>AND mode[max]R > 170<br>AND mode[max]G > 170<br>AND mode[max]B > 170                                                        | 3            |
| 7    | Land         | Buildings    | Brightness > 190<br>AND Relative border to buildings > 0.1<br>AND Relative border to land < 0.8<br>AND mode[max]R > 190<br>AND mode[max]G > 190<br>AND mode[max]B > 190                                     | Infinite     |
| 8    | Land         | Buildings    | Brightness > 190<br>Border to buildings > 0<br>AND Relative border to land < 0.8<br>AND mode[max]R > 190<br>AND mode[max]G > 190<br>AND mode[max]B > 190                                                    | Infinite     |
| 9    | Land         | Buildings    | Brightness > 100<br>AND Border to buildings > 0<br>AND Relative border to buildings > 0.3<br>AND Relative border to land < 0.8<br>AND mode[max]R > 130<br>AND mode[max]G > 140                              | 3            |

| Step | Source class | Target class | Condition                                  | No of cycles |
|------|--------------|--------------|--------------------------------------------|--------------|
| 10   | Land         | Buildings    | AND mode[max]B > 150                       | Infinite     |
|      |              |              | Brightness > 200                           |              |
|      |              |              | AND Distance to buildings > =5             |              |
|      |              |              | AND Distance to buildings < =10            |              |
|      |              |              | AND mode[max]R > 190                       |              |
|      |              |              | AND mode[max]G > 190                       |              |
| 11   | Land         | Buildings    | AND mode[max]B > 190                       | 3            |
|      |              |              | Brightness > 120                           |              |
|      |              |              | AND Relative border to buildings > 0.1     |              |
|      |              |              | AND mode[max]R > 120                       |              |
|      |              |              | AND mode[max]G > 120                       |              |
|      |              |              | AND mode[max]B > 120                       |              |
| 12   | Land         | Buildings    | AND mode[max]B > =mode[max]R               | 3            |
|      |              |              | Relative border to buildings > =0.75       |              |
| 13   | Buildings    | Land         | Brightness > 190                           | Infinite     |
|      |              |              | AND Relative border to land > 0.4          |              |
|      |              |              | AND Asymmetry < 0.75                       |              |
|      |              |              | AND Length/Width <2.5                      |              |
|      |              |              | AND GLCM Contrast (all. Directions) < 4000 |              |
|      |              |              | AND mode[max]R > 190                       |              |
|      |              |              | AND mode[max]G > 190                       |              |
|      |              |              | AND mode[max]B > 190                       |              |

**Table S4** Variable importance determined by the RF model trained with a sample that excluded vehicles. Letters R, G, and B refer to the red, green and blue bands of the Unmanned Aerial Vehicle (UAV) image. Variable type refers to its capacity to describe spectral (Sl) or geometric (Gc) properties of an image object. The definitions are based on the eCognition Developer 10.0 Reference Book.

| ID | Feature                             | Type | Definition                                                                                                                 | Importance |
|----|-------------------------------------|------|----------------------------------------------------------------------------------------------------------------------------|------------|
| 1  | Area                                | Gc   | The number of pixels forming an image object                                                                               | 0.0535     |
| 2  | Width                               | Gc   | Width of an object calculates as the number of pixels within the object divided by the length to width ratio of the object | 0.0501     |
| 3  | Mean of inner border R              | Sl   | Mean layer intensity value of red band pixels belonging to the inner border of an object                                   | 0.0414     |
| 4  | Length of longest edge (polygon)    | Gc   | Length of the longest edge of polygons vectorised from image objects                                                       | 0.0294     |
| 5  | Border contrast R                   | Sl   | Mean value of the red band pixel edge contrasts of all edges of an object                                                  | 0.0256     |
| 6  | Border length                       | Gc   | Sum of edges of the image object located within inner and outer borders                                                    | 0.0241     |
| 7  | Border contrast B                   | Sl   | Mean value of the blue band pixel edge contrasts of all edges of an object                                                 | 0.0228     |
| 8  | mode[Maximum](R)                    | Sl   | The largest pixel value occurring most often within an object in the red band                                              | 0.0225     |
| 9  | Length                              | Gc   | Length of an object calculated as a square root of the product of the number of pixels and length to width ratio           | 0.0223     |
| 10 | Perimeter (polygon)                 | Gc   | The sum of lengths of all edges of the polygon vectorised from the image object                                            | 0.0213     |
| 11 | Average length of edges (polygon)   | Gc   | The average length of edges of the polygon vectorised from the image object                                                | 0.0211     |
| 12 | Border contrast G                   | Sl   | Mean value of the green band pixel edge contrasts of all edges of an object                                                | 0.0206     |
| 13 | StdDev of length of edges (polygon) | Gc   | Measure of deviation of the lengths of edges of the polygon vectorised from an image object from their mean value          | 0.0195     |
| 14 | Ratio R                             | Sl   | Contribution of the red image band to the total brightness of the object                                                   | 0.0192     |
| 15 | mode[Median](R)                     | Sl   | The median value of the most frequently occurring red band pixel values within an object                                   | 0.0188     |



| ID | Feature                                            | Type | Definition                                                                                                                                                                                                                                                                                                                | Importance |
|----|----------------------------------------------------|------|---------------------------------------------------------------------------------------------------------------------------------------------------------------------------------------------------------------------------------------------------------------------------------------------------------------------------|------------|
| 16 | Ratio G                                            | SI   | Contribution of the green image band to the total brightness of the object                                                                                                                                                                                                                                                | 0.0186     |
| 17 | Mean of inner border B                             | SI   | Mean layer intensity value of blue band pixels belonging to the inner border of an object                                                                                                                                                                                                                                 | 0.0177     |
| 18 | Density                                            | Gc   | The number of pixels of an image object divided by its approximated radius, with a square shape having the highest density                                                                                                                                                                                                | 0.0164     |
| 19 | Max. diff.                                         | SI   | The ratio of the maximum value of the difference between intensity of image bands and brightness within an image object                                                                                                                                                                                                   | 0.0163     |
| 20 | Mean of inner border G                             | SI   | Mean layer intensity value of green band pixels belonging to the inner border of an object                                                                                                                                                                                                                                | 0.0156     |
| 21 | Edge Contrast of neighbor pixels (Prototype) R (3) | SI   | The contrast between intensity of red band pixels belonging to an object and its surrounding area 3 pixels wide calculated as the difference between the mean intensity value of the brighter and darker pixels, where the latter are determined by values larger or smaller than the mean intensity value of the object  | 0.0151     |
| 22 | Contrast to neighbor pixels R (3)                  | SI   | The mean difference in contrast compared to a surrounding area 3 pixels in size in the red band                                                                                                                                                                                                                           | 0.0143     |
| 23 | mode[Maximum](G)                                   | SI   | The largest pixel value occurring most often within an object in the green band                                                                                                                                                                                                                                           | 0.0141     |
| 24 | mode[Maximum](B)                                   | SI   | The largest pixel value occurring most often within an object in the blue band                                                                                                                                                                                                                                            | 0.0140     |
| 25 | Edge Contrast of neighbor pixels (Prototype) B (3) | SI   | The contrast between intensity of blue band pixels belonging to an object and its surrounding area 3 pixels wide calculated as the difference between the mean intensity value of the brighter and darker pixels, where the latter are determined by values larger or smaller than the mean intensity value of the object | 0.0140     |
| 26 | mode[Median](G)                                    | SI   | The median value of the most frequently occurring pixel values within an object in the green band                                                                                                                                                                                                                         | 0.0139     |
| 27 | mode[Minimum](R)                                   | SI   | The smallest pixel value occurring most often within an object in the red band.                                                                                                                                                                                                                                           | 0.0138     |

| ID | Feature                                            | Type | Definition                                                                                                                                                                                                                                                                                                                  | Importance |
|----|----------------------------------------------------|------|-----------------------------------------------------------------------------------------------------------------------------------------------------------------------------------------------------------------------------------------------------------------------------------------------------------------------------|------------|
| 28 | mode[Median](B)                                    | SI   | The median value of the most frequently occurring pixel values within an object in the blue band.                                                                                                                                                                                                                           | 0.0137     |
| 29 | mode[Minimum](G)                                   | SI   | The smallest pixel value occurring most often within an object in the green band.                                                                                                                                                                                                                                           | 0.0136     |
| 30 | Mean of outer border R                             | SI   | Mean layer intensity value of the red band pixels belonging to the outer border of an object.                                                                                                                                                                                                                               | 0.0136     |
| 31 | Edge Contrast of neighbor pixels (Prototype) G (3) | SI   | The contrast between intensity of green band pixels belonging to an object and its surrounding area 3 pixels wide calculated as the difference between the mean intensity value of the brighter and darker pixels, where the latter are determined by values larger or smaller than the mean intensity value of the object. | 0.0133     |
| 32 | Ratio B                                            | SI   | Contribution of the blue image band to the total brightness of the object.                                                                                                                                                                                                                                                  | 0.0133     |
| 33 | Contrast to neighbor pixels G (3)                  | SI   | The mean difference in contrast compared to a surrounding area 3 pixels in size in the green band.                                                                                                                                                                                                                          | 0.0132     |
| 34 | Contrast to neighbor pixels B (3)                  | SI   | The mean difference in contrast compared to a surrounding area 3 pixels in size in the blue band.                                                                                                                                                                                                                           | 0.0132     |
| 35 | Shape index                                        | Gc   | A measure of shape complexity of and object, calculates as the border length divided by four times the square root of the object's area.                                                                                                                                                                                    | 0.0131     |
| 36 | Mean of outer border G                             | SI   | Mean layer intensity value of the green band pixels belonging to the outer border of an object.                                                                                                                                                                                                                             | 0.0131     |
| 37 | Skewness R                                         | SI   | The asymmetry of distribution of object's pixel values in the red band.                                                                                                                                                                                                                                                     | 0.0131     |
| 38 | Number of edges (polygon)                          | Gc   | The number of edges of a polygon formed by vectorization of an object.                                                                                                                                                                                                                                                      | 0.0130     |
| 39 | Border index                                       | Gc   | Measures irregularity of an object. Similar to the Shape index except that it uses a rectangular approximation of an object instead of a square.                                                                                                                                                                            | 0.0130     |
| 40 | StdDev. to neighbor pixels G (3)                   | SI   | Standard deviation of green band pixel values in the surrounding area 3 pixels away from the object and not belonging to the object.                                                                                                                                                                                        | 0.0130     |
| 41 | StdDev. to neighbor pixels B (3)                   | SI   | Standard deviation of blue band pixel values in the surrounding area 3 pixels away from the object and not belonging to the object.                                                                                                                                                                                         | 0.0130     |

| ID | Feature                              | Type | Definition                                                                                                                                                                                                              | Importance |
|----|--------------------------------------|------|-------------------------------------------------------------------------------------------------------------------------------------------------------------------------------------------------------------------------|------------|
| 42 | Mean of outer border B               | Sl   | Mean layer intensity value of the blue band pixels belonging to the outer border of an object.                                                                                                                          | 0.0130     |
| 43 | mode[Minimum](B)                     | Sl   | The smallest pixel value occurring most often within an object in the blue band.                                                                                                                                        | 0.0130     |
| 44 | Compactness (polygon)                | Gc   | The ratio of the area of a polygon representing a vectorized object to the area of a circle with the same perimeter.                                                                                                    | 0.0129     |
| 45 | Brightness                           | Sl   | The value of intensity of pixels contained in an object for all image bands.                                                                                                                                            | 0.0128     |
| 46 | StdDev. to neighbor pixels R (3)     | Sl   | Standard deviation of red band pixel values in the surrounding area 3 pixels away from the object and not belonging to the object.                                                                                      | 0.0128     |
| 47 | Skewness B                           | Sl   | The asymmetry of distribution of object's pixel values in the blue band.                                                                                                                                                | 0.0128     |
| 48 | Skewness G                           | Sl   | The asymmetry of distribution of object's pixel values in the green band.                                                                                                                                               | 0.0128     |
| 49 | Number of inner objects (polygon)    | Gc   | The number of inner polygons within a polygon representing a vectorized object.                                                                                                                                         | 0.0128     |
| 50 | Length/Width                         | Gc   | Length to width ratio returned as the smallest value of the ratio of the eigenvalues of the covariance matrix, with the larger value being the numerator or the width to length ratio of the bounding box of an object. | 0.0128     |
| 51 | Rel. border to image border          | Gc   | The relative border length an object shares with the scene border.                                                                                                                                                      | 0.0128     |
| 52 | Asymmetry                            | Gc   | Comparison between an image object with an approximated ellipse around the given object, based on the variance in the x and y directions.                                                                               | 0.0128     |
| 53 | Compactness                          | Gc   | The product of the length and width of an objects divided by the number of pixels within the object.                                                                                                                    | 0.0128     |
| 54 | Elliptic fit                         | Gc   | A measure of how well an object fits into an ellipse with the same area as the object.                                                                                                                                  | 0.0128     |
| 55 | Radius of largest enclosed ellipse   | Gc   | The ratio between the radius of an ellipse of an area equal to the area of the object and an ellipse scaled down until it fully fits inside the object.                                                                 | 0.0128     |
| 56 | Radius of smallest enclosing ellipse | Gc   | The ratio between the radius of an ellipse of an area equal to the area of                                                                                                                                              | 0.0128     |

| ID | Feature         | Type | Definition                                                                                                                                                                                                           | Importance |
|----|-----------------|------|----------------------------------------------------------------------------------------------------------------------------------------------------------------------------------------------------------------------|------------|
| 57 | Rectangular fit | Gc   | the object and an ellipse scaled up until it fully encompasses the object.<br>The ratio of the area outside and inside the rectangle with the same area as an object, i.e., the same width and length as the object. | 0.0128     |
| 58 | Roundness       | Gc   | A measure of how similar an object is to an ellipse calculated as the difference between the radius of the largest enclosed ellipse and the smallest enclosing ellipse.                                              | 0.0128     |

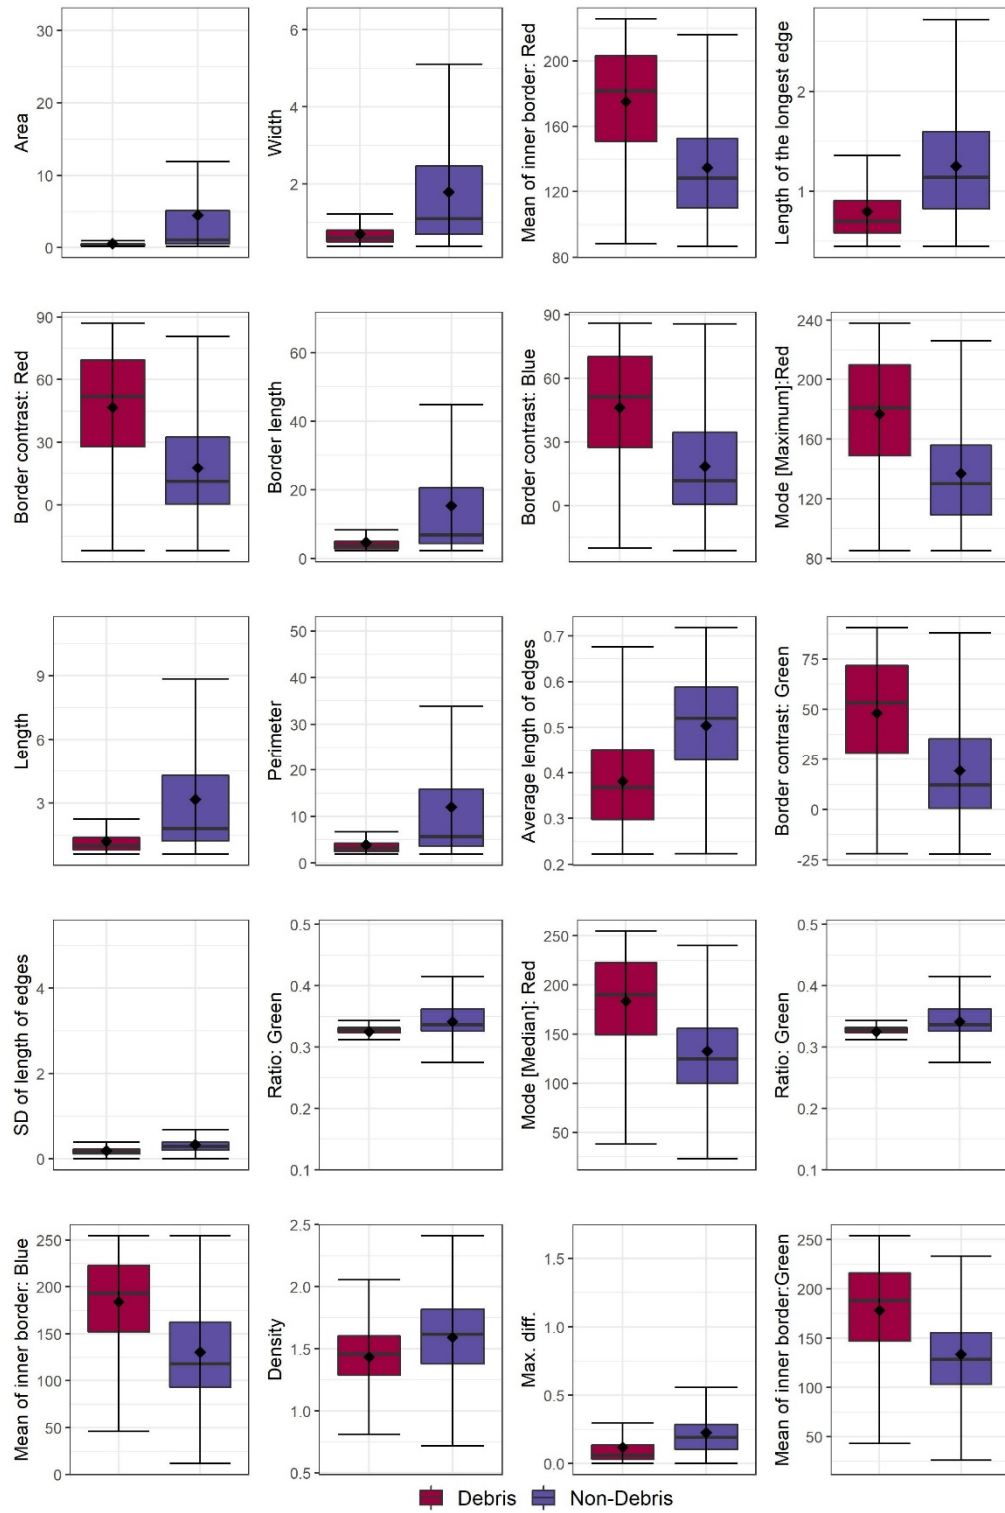

**Figure S1** Distribution of the top 20 predictor variables of debris and non-debris features identified by the Random Forest model training dataset including vehicles.
